# Supplementary material for: Probing the role of stochasticity in a model of the embryonic stem cell – heterogeneous gene expression and reprogramming efficiency
Source: PubMed Central journal article supplement (PMC3468383; doi:10.1186/1752-0509-6-98), 2012-08-13
Supplement: 1752-0509-6-98-S4.pdf [file 1752-0509-6-98-S4.pdf]

# Additional file 4 – An architecture with no differentiation gene G

Vijay Chickarmane<sup>2</sup>, Victor Olariu<sup>1</sup> and Carsten Peterson<sup>\*1,3</sup>

<sup>1</sup>Computational Biology & Biological Physics, Lund University, Lund, Sweden

<sup>2</sup>Division of Biology, California Institute of Technology, Pasadena, USA

<sup>3</sup>Lund Strategic Research Center for Stem Cell Biology and Cell Therapy, Lund University, Lund, Sweden

Email: Vijay Chickarmane - vchickar@caltech.edu; Victor Olariu - victor.olariu@thep.lu.se; Carsten Peterson \* - carsten@thep.lu.se;

\*Corresponding author

We performed a similar analysis for a modified network topology without the differentiation gene G. The corresponding dynamical equations are given by Equation 3.

$$\begin{aligned}\frac{d[N]}{dt} &= \frac{k_0[OS](c_0 + c_1[N]^2 + k_0[OS] + c_2LIF)}{(1 + (k_0[OS](c_1[N]^2 + k_0[OS] + c_2LIF + c_3[FGF]^2))} \\ &\quad - \gamma[N], \\ \frac{d[OS]}{dt} &= \alpha + \frac{(e_0 + e_1[OS])}{(1 + e_1[OS])} - \gamma[OS] \\ \frac{d[FGF]}{dt} &= \frac{(a_0 + a_1[OS])}{(1 + a_1[OS] + a_2I_3)} - \gamma[FGF]\end{aligned}$$

This model with no G can reproduce the time series expressions for the case with the cells in the ES state (Figure 2 A, B, C and D). However, and not surprisingly, when differentiation occurs, the OCT4-SOX2 expression is not lost since G is not present in the model to antagonize OCT4-SOX2 (Additional file 3: Figure S3). Hence, a model without G is not capable to cover the important ESC process of differentiation. When the same model with no G is applied to the reprogramming study it could reproduce the results in Figure 4B. However, this simplified model allows reprogramming even without over-expression of any of the transcription factors in the network. These result contradicts experimental findings where over-expression is necessary for successful reprogramming.
